# Supplementary material
Source: PubMed Central journal article supplement (PMC1691795)
Supplement: 15315895s01.pdf [file 15315895s01.pdf]

These are electronic appendices to the paper by Bidartondo *et al.* 2004 Changing partners in the dark: isotopic and molecular evidence of ectomycorrhizal liaisons between forest orchids and trees. *Proc. R. Soc. Lond. B* **271**, 1799–1806. (doi 10.1098/rspb.2004.2807)

Electronic appendices are refereed with the text. However, no attempt is made to impose a uniform editorial style on the electronic appendices.

**Electronic Appendix A.** Plants sampled for isotope ratio mass spectrometric analysis. L corresponds to Ellenberg's light indicator values. Functional group abbreviations: ECM, ectomycorrhizal; AM, arbuscular mycorrhizal; NM, non-mycorrhizal; FIX, N<sub>2</sub>-fixer.

| Site | Orchid                          | n | L | Non-orchid                      | Abbreviation | n | L | Functional group |
|------|---------------------------------|---|---|---------------------------------|--------------|---|---|------------------|
| 1    | <i>Cephalanthera damasonium</i> | 4 | 3 | <i>Fagus sylvatica</i>          | <i>F.s.</i>  | 4 | 3 | ECM              |
| 1    | <i>Cephalanthera rubra</i>      | 4 | 4 | <i>Helianthemum nummularium</i> | <i>H.n.</i>  | 1 | 7 | ECM              |
|      |                                 |   |   | <i>Anthericum ramosum</i>       | <i>A.r.</i>  | 4 | 7 | AM/NM            |
|      |                                 |   |   | <i>Euphorbia cyparissias</i>    | <i>E.c.</i>  | 4 | 8 | AM/NM            |
|      |                                 |   |   | <i>Galium verum</i>             | <i>G.v.</i>  | 4 | 7 | AM/NM            |
|      |                                 |   |   | <i>Polygala chamaebuxus</i>     | <i>P.c.</i>  | 3 | 6 | AM/NM            |
|      |                                 |   |   | <i>Polygonatum multiflorum</i>  | <i>P.m.</i>  | 1 | 3 | AM/NM            |
| 1    | <i>Epipactis atrorubens</i>     | 4 | 6 | <i>Fagus sylvatica</i>          | <i>F.s.</i>  | 3 | 3 | ECM              |
|      |                                 |   |   | <i>Coronilla varia</i>          | <i>C.v.</i>  | 4 | 7 | AM/FIX           |
|      |                                 |   |   | <i>Anthericum ramosum</i>       | <i>A.r.</i>  | 4 | 7 | AM/NM            |
|      |                                 |   |   | <i>Galium verum</i>             | <i>G.v.</i>  | 4 | 7 | AM/NM            |
| 1    | <i>Platanthera chlorantha</i>   | 4 | 6 | <i>Helianthemum nummularium</i> | <i>H.n.</i>  | 1 | 7 | ECM              |
|      |                                 |   |   | <i>Anthericum ramosum</i>       | <i>A.r.</i>  | 2 | 7 | AM/NM            |
|      |                                 |   |   | <i>Euphorbia cyparissias</i>    | <i>E.c.</i>  | 2 | 8 | AM/NM            |
|      |                                 |   |   | <i>Galium verum</i>             | <i>G.v.</i>  | 2 | 7 | AM/NM            |
|      |                                 |   |   | <i>Polygala chamaebuxus</i>     | <i>P.c.</i>  | 1 | 6 | AM/NM            |
|      |                                 |   |   | <i>Polygonatum multiflorum</i>  | <i>P.m.</i>  | 1 | 3 | AM/NM            |
| 1    | <i>Neottia nidus-avis</i>       | 4 | 2 |                                 |              |   |   |                  |
| 2    | <i>Epipactis helleborine</i>    | 4 | 3 | <i>Fagus sylvatica</i>          | <i>F.s.</i>  | 4 | 3 | ECM              |
|      |                                 |   |   | <i>Lathyrus vernus</i>          | <i>La.v.</i> | 4 | 4 | AM/FIX           |
|      |                                 |   |   | <i>Aegopodium podagraria</i>    | <i>A.p.</i>  | 1 | 5 | AM/NM            |
|      |                                 |   |   | <i>Convallaria majalis</i>      | <i>C.m.</i>  | 4 | 5 | AM/NM            |
|      |                                 |   |   | <i>Fragaria vesca</i>           | <i>F.v.</i>  | 1 | 7 | AM/NM            |
|      |                                 |   |   | <i>Hedera helix</i>             | <i>H.h.</i>  | 2 | 4 | AM/NM            |
| 3    | <i>Epipactis distans</i>        | 4 | 3 | <i>Quercus robur</i>            | <i>Q.r.</i>  | 1 | 7 | ECM              |
|      |                                 |   |   | <i>Anthyllis vulneraria</i>     | <i>A.v.</i>  | 1 | 8 | AM/FIX           |
|      |                                 |   |   | <i>Lotus corniculatus</i>       | <i>L.c.</i>  | 2 | 7 | AM/FIX           |
|      |                                 |   |   | <i>Ononis repens</i>            | <i>O.r.</i>  | 1 | 8 | AM/FIX           |
|      |                                 |   |   | <i>Euphorbia cyparissias</i>    | <i>E.c.</i>  | 4 | 8 | AM/NM            |
|      |                                 |   |   | <i>Juniperus communis</i>       | <i>J.c.</i>  | 2 | 9 | AM/NM            |
|      |                                 |   |   | <i>Sesleria albicans</i>        | <i>S.a.</i>  | 4 | 7 | AM/NM            |
| 4    | <i>Epipactis palustris</i>      | 4 | 8 | <i>Trifolium pratense</i>       | <i>T.p.</i>  | 4 | 7 | AM/FIX           |
| 4    | <i>Dactylorhiza majalis</i>     | 4 | 8 | <i>Briza media</i>              | <i>B.m.</i>  | 4 | 8 | AM/NM            |
|      |                                 |   |   | <i>Colchicum autumnale</i>      | <i>C.a.</i>  | 4 | 6 | AM/NM            |
|      |                                 |   |   | <i>Lysimachia vulgaris</i>      | <i>L.v.</i>  | 4 | 6 | AM/NM            |

## Electronic Appendix B. PCR primers used in this study.

| Name     | Sequence 3'-5'          | Target | Specificity   | Reference                |
|----------|-------------------------|--------|---------------|--------------------------|
| ITS1     | tccgtaggtgaacctgcgg     | nrITS  | eukaryotic    | White <i>et al.</i> 1990 |
| ITS1F    | cttggtcatttagaggaagtaa  | nrITS  | fungal        | Gardes & Bruns 1993      |
| ITS4     | tcctccgcttattgatatgc    | nrITS  | eukaryotic    | White <i>et al.</i> 1990 |
| ITS4B    | caggagacttgtagacgggccag | nrITS  | basidiomycete | Gardes & Bruns 1993      |
| ITS4-Tul | ccgccagattcacacattga    | nrITS  | tulasnelloid  | Taylor 1997              |
| TW14     | gctatcctgagggaaacttc    | nrLSU  | eukaryotic    | unpublished              |
| ML5      | ctcgcaaattatcctcataag   | mtLSU  | fungal        | White <i>et al.</i> 1990 |
| ML6      | cagtagaagctgcatagggtc   | mtLSU  | fungal        | White <i>et al.</i> 1990 |
| NS5      | aactaaaggaattgacggaag   | nrSSU  | eukaryotic    | White <i>et al.</i> 1990 |
| cML5.5   | tagcggcttaactatgagg     | mtLSU  | fungal        | White <i>et al.</i> 1990 |
| MLin3    | cgacacaggttcgtaggtag    | mtLSU  | fungal        | White <i>et al.</i> 1990 |

## References

- Gardes, M. & Bruns, T. D. 1993 ITS primers with enhanced specificity for basidiomycetes: application to the identification of mycorrhizae and rusts. *Mol. Ecol.* **2**, 113-118.
- Taylor, D. L. 1997 The evolution of myco-heterotrophy and specificity in some North American orchids. Ph. D. dissertation, University of California at Berkeley.
- White, T. J., Bruns, T. D., Lee, S. & Taylor, J. W. 1990 Amplification and direct sequencing of fungal ribosomal RNA genes for phylogenetics. In *PCR protocols: a guide to methods and applications* (eds. M. A. Innis, D. H. Gelfand, J. J. Sninsky & T. J. White), pp. 315-322. San Diego: Academic Press.

**Electronic Appendix C.** Molecular characterization of mycorrhizal fungi from German orchids. Only known mycorrhizal lineages (orchid, ectomycorrhizal and/or ericoid) are listed. Obligately ectomycorrhizal lineages are shown in bold. Root numbers are not listed for orchid roots where pelotons (i.e., orchid mycorrhizas) were not observed. The results from 2-4 sections individually analyzed for each root have been combined.

| Site | Host species                    | Plant | Root | Pelotons | ITS <sup>‡</sup>                                                     | mtLSU <sup>§</sup>  | ITS1/ITS4-Tul         | ITS1F/TW14                             |
|------|---------------------------------|-------|------|----------|----------------------------------------------------------------------|---------------------|-----------------------|----------------------------------------|
| 1    | <i>Cephalanthera damasonium</i> | 1     |      | no       | n.d.                                                                 | n.d.                | n.d.                  | n.d.                                   |
| 1    | <i>Cephalanthera damasonium</i> | 2     | 4080 | yes      | <b><i>Tomentella</i></b>                                             | <b>theleporoid</b>  | -                     | n.d.                                   |
| 1    | <i>Cephalanthera damasonium</i> | 2     | 4081 | yes      | <b><i>Tomentella</i></b>                                             | <b>theleporoid</b>  | -                     | n.d.                                   |
| 1    | <i>Cephalanthera damasonium</i> | 2     | 4082 | yes      | <b><i>Tomentella</i></b>                                             | <b>theleporoid</b>  | -                     | <b><i>Tomentella</i></b>               |
| 1    | <i>Cephalanthera damasonium</i> | 3     | 4083 | yes      | <b><i>Thelephora</i></b>                                             | -                   | -                     | n.d.                                   |
| 1    | <i>Cephalanthera damasonium</i> | 3     | 4084 | yes      | <b><i>Inocybe</i></b>                                                | -                   | -                     | n.d.                                   |
| 1    | <i>Cephalanthera damasonium</i> | 3     | 4085 | yes      | <b><i>Cortinarius</i></b>                                            | <b>cortinarioid</b> | -                     | <b><i>Cortinarius</i></b> <sup>†</sup> |
| 1    | <i>Cephalanthera damasonium</i> | 4     | 4086 | yes      | <b><i>Hymenogaster</i></b>                                           | -                   | -                     | n.d.                                   |
| 1    | <i>Cephalanthera damasonium</i> | 4     | 4087 | yes      | <b><i>Hymenogaster</i></b>                                           | -                   | -                     | n.d.                                   |
| 1    | <i>Cephalanthera damasonium</i> | 4     | 4088 | yes      | <b><i>Hymenogaster</i></b>                                           | -                   | -                     | <b><i>Hymenogaster</i></b>             |
| 1    | <i>Cephalanthera rubra</i>      | 1     | 4089 | yes      | <b><i>Tomentella</i></b>                                             | -                   | -                     | n.d.                                   |
| 1    | <i>Cephalanthera rubra</i>      | 2     | 4090 | yes      | <b><i>Tomentella</i></b>                                             | <b>theleporoid</b>  | -                     | n.d.                                   |
| 1    | <i>Cephalanthera rubra</i>      | 3     | 4091 | yes      | <b><i>Tomentella</i></b>                                             | -                   | -                     | n.d.                                   |
| 1    | <i>Cephalanthera rubra</i>      | 4     | 4092 | yes      | <i>Leptodontidium</i><br><i>Phialophora</i> *                        | <b>theleporoid</b>  | -                     | n.d.                                   |
| 1    | <i>Cephalanthera rubra</i>      | 4     | 4093 | yes      | -                                                                    | <b>theleporoid</b>  | -                     | n.d.                                   |
| 1    | <i>Epipactis atrorubens</i>     | 1     | 4094 | yes      | <b><i>Inocybe</i></b>                                                | -                   | -                     | <b><i>Inocybe</i></b> <sup>†</sup>     |
| 1    | <i>Epipactis atrorubens</i>     | 1     | 4095 | yes      | <i>sebacinoid</i> *                                                  | -                   | -                     | n.d.                                   |
| 1    | <i>Epipactis atrorubens</i>     | 2     |      | no       | n.d.                                                                 | n.d.                | n.d.                  | n.d.                                   |
| 1    | <i>Epipactis atrorubens</i>     | 3     | 4100 | yes      | <b><i>Wilcoxina</i></b>                                              | -                   | -                     | n.d.                                   |
| 1    | <i>Epipactis atrorubens</i>     | 3     | 4101 | yes      | <b><i>Wilcoxina</i></b>                                              | -                   | -                     | n.d.                                   |
| 1    | <i>Epipactis atrorubens</i>     | 3     | 4102 | yes      | <i>Phialophora</i> *                                                 | <i>Tulasnella</i> * | <i>tulasnelloid</i> * | n.d.                                   |
| 1    | <i>Epipactis atrorubens</i>     | 4     | 4104 | yes      | <i>Leptodontidium</i><br><b><i>Tuber</i></b>                         | -                   | -                     | n.d.                                   |
| 1    | <i>Platanthera chlorantha</i>   | 1     | 4096 | yes      | -                                                                    | <i>Tulasnella</i> * | <i>tulasnelloid</i> * | n.d.                                   |
| 1    | <i>Platanthera chlorantha</i>   | 1     | 4097 | yes      | <i>Phialophora</i> *                                                 | <i>Tulasnella</i> * | <i>tulasnelloid</i> * | n.d.                                   |
| 1    | <i>Platanthera chlorantha</i>   | 2     | 4098 | yes      | -                                                                    | <i>Tulasnella</i> * | <i>tulasnelloid</i> * | n.d.                                   |
| 1    | <i>Platanthera chlorantha</i>   | 2     | 4099 | yes      | <i>Leptodontidium</i><br><i>Phialophora</i><br><i>Ceratobasidium</i> | -                   | -                     | n.d.                                   |
| 2    | <i>Epipactis helleborine</i>    | 1     | 4116 | yes      | <b><i>Tuber</i></b>                                                  | -                   | -                     | <b><i>Tuber</i></b>                    |
| 2    | <i>Epipactis helleborine</i>    | 1     | 4117 | yes      | <i>Ceratobasidium</i>                                                | -                   | -                     | n.d.                                   |
| 2    | <i>Epipactis helleborine</i>    | 2     | 4118 | yes      | <b><i>Wilcoxina</i></b>                                              | -                   | -                     | n.d.                                   |
| 2    | <i>Epipactis helleborine</i>    | 2     | 4119 | yes      | <b><i>Wilcoxina</i></b>                                              | -                   | -                     | n.d.                                   |
| 2    | <i>Epipactis helleborine</i>    | 3     |      | no       | n.d.                                                                 | n.d.                | n.d.                  | n.d.                                   |
| 2    | <i>Epipactis helleborine</i>    | 4     | 4121 | yes      | <i>Sebacinaceae</i> *                                                | -                   | -                     | n.d.                                   |
| 3    | <i>Pinus sylvestris</i>         |       | 4109 | n/a      | corticoid*                                                           | -                   | n.d.                  | n.d.                                   |
| 3    | <i>Pinus sylvestris</i>         |       | 4110 | n/a      | corticoid*                                                           | -                   | n.d.                  | n.d.                                   |
| 3    | <i>Pinus sylvestris</i>         |       | 4111 | n/a      | <b><i>Rhizopogon</i></b>                                             | <b>suilloid</b>     | n.d.                  | n.d.                                   |
| 3    | <i>Pinus sylvestris</i>         |       | 4112 | n/a      | <b><i>Inocybe</i></b>                                                | <b>cortinarioid</b> | n.d.                  | n.d.                                   |
| 3    | <i>Pinus sylvestris</i>         |       | 4113 | n/a      | <b><i>Wilcoxina</i></b>                                              | -                   | n.d.                  | n.d.                                   |
| 3    | <i>Epipactis distans</i>        | 1     | 4105 | yes      | <b><i>Wilcoxina</i></b>                                              | -                   | -                     | n.d.                                   |
| 3    | <i>Epipactis distans</i>        | 1     | 4106 | yes      | <b><i>Wilcoxina</i></b>                                              | -                   | -                     | n.d.                                   |
| 3    | <i>Epipactis distans</i>        | 1     | 4107 | yes      | <b><i>Wilcoxina</i></b>                                              | -                   | -                     | n.d.                                   |
| 3    | <i>Epipactis distans</i>        | 1     | 4108 | yes      | <b><i>Wilcoxina</i></b>                                              | -                   | -                     | n.d.                                   |
| 3    | <i>Epipactis distans</i>        | 2     | 4114 | yes      | <b><i>Wilcoxina</i></b>                                              | -                   | -                     | n.d.                                   |
| 3    | <i>Epipactis distans</i>        | 2     | 4115 | yes      | <b><i>Wilcoxina</i></b>                                              | -                   | -                     | n.d.                                   |

|   |                             |   |      |     |                       |                    |   |                       |
|---|-----------------------------|---|------|-----|-----------------------|--------------------|---|-----------------------|
| 4 | <i>Dactylorhiza majalis</i> | 1 | 4064 | yes | <i>Tulasnella*</i>    | <i>Tulasnella*</i> | - | n.d.                  |
| 4 | <i>Dactylorhiza majalis</i> | 1 | 4065 | yes | <i>Tulasnella*</i>    | <i>Tulasnella*</i> | - | <i>Tulasnella*</i>    |
| 4 | <i>Dactylorhiza majalis</i> | 2 | 4066 | yes | <i>Ceratobasidium</i> | -                  | - | n.d.                  |
| 4 | <i>Dactylorhiza majalis</i> | 2 | 4067 | yes | <i>Tulasnella*</i>    | <i>Tulasnella*</i> | - | n.d.                  |
|   |                             |   |      |     | <i>Ceratobasidium</i> |                    |   |                       |
| 4 | <i>Dactylorhiza majalis</i> | 3 | 4068 | yes | <i>Ceratobasidium</i> | -                  | - | n.d.                  |
| 4 | <i>Dactylorhiza majalis</i> | 3 | 4069 | yes | <i>Ceratobasidium</i> | -                  | - | n.d.                  |
| 4 | <i>Dactylorhiza majalis</i> | 4 | 4070 | yes | <i>Ceratobasidium</i> | -                  | - | n.d.                  |
| 4 | <i>Dactylorhiza majalis</i> | 4 | 4071 | yes | <i>Ceratobasidium</i> | -                  | - | n.d.                  |
| 4 | <i>Epipactis palustris</i>  | 1 | 4072 | yes | <i>Leptodontidium</i> | -                  | - | n.d.                  |
| 4 | <i>Epipactis palustris</i>  | 1 | 4073 | yes | <i>Ceratobasidium</i> | -                  | - | n.d.                  |
| 4 | <i>Epipactis palustris</i>  | 2 | 4074 | yes | <i>Ceratobasidium</i> | -                  | - | <i>Ceratobasidium</i> |
| 4 | <i>Epipactis palustris</i>  | 2 | 4075 | yes | <i>Ceratobasidium</i> | -                  | - | n.d.                  |
| 4 | <i>Epipactis palustris</i>  | 3 | 4076 | yes | <i>Ceratobasidium</i> | -                  | - | n.d.                  |
| 4 | <i>Epipactis palustris</i>  | 3 | 4077 | yes | <i>Ceratobasidium</i> | -                  | - | n.d.                  |
| 4 | <i>Epipactis palustris</i>  | 4 | 4078 | yes | <i>sebacinoid*</i>    | -                  | - | <i>Sebacina*</i>      |
| 4 | <i>Epipactis palustris</i>  | 4 | 4079 | yes | <i>Ceratobasidium</i> | -                  | - | n.d.                  |

Notes:

\* Lineages known to contain some ectomycorrhizal strains.

‡ Results from ITS1F/ITS4 and ITS1F/4B have been combined.

§ Results from ML5/ML6, cML5.5/ML6 and MLin3/ML6 have been combined. The latter amplified an orchid mitochondrial fragment.

† Partial sequences were obtained that sufficed for identification purposes.

**Electronic Appendix D.** Molecular characterization of fungi from three additional *Epipactis* species sampled outside Germany. All fungal identifications are based on nrITS sequence data obtained from individual root sections containing fungal pelotons. Obligately ectomycorrhizal fungal lineages are shown in bold.

| Host species                           | Location       | State/Country | Roots | Sections       | Fungi (No. sections where detected)                 |
|----------------------------------------|----------------|---------------|-------|----------------|-----------------------------------------------------|
| <i>Epipactis dunensis</i>              | Anglesey       | Wales         | 1     | 7062           | <b>Tuber</b> (1)                                    |
| <i>Epipactis dunensis</i>              | Anglesey       | Wales         | 6     | 7066-71        | <b>Inocybe</b> (1), Pezizales (1), <b>Tuber</b> (1) |
| <i>Epipactis dunensis</i>              | Anglesey       | Wales         | 4     | 7073-76        | Pezizales (1), <b>Tuber</b> (3)                     |
| <i>Epipactis dunensis</i>              | Anglesey       | Wales         | 1     | 7078           | <b>Tuber</b> (1)                                    |
| <i>Epipactis dunensis</i>              | Anglesey       | Wales         | 4     | 7082-85        | Pezizales (3)                                       |
| <i>Epipactis dunensis</i>              | Anglesey       | Wales         | 3     | 7087-89        | <b>Tuber</b> (2)                                    |
| <i>Epipactis dunensis</i>              | Anglesey       | Wales         | 3     | 6043-45        | <b>Tuber</b> (3)                                    |
| <i>Epipactis gigantea</i> <sup>§</sup> | Angelo Reserve | California    | 2     | 3075-82        | Pyronemataceae (4)                                  |
| <i>Epipactis gigantea</i>              | Angelo Reserve | California    | 1     | 3084-87        | Sebacinaceae (3)                                    |
| <i>Epipactis gigantea</i>              | Angelo Reserve | California    | 2     | 3089-93        | <i>Piriformospora</i> (3)                           |
| <i>Epipactis gigantea</i>              | Angelo Reserve | California    | 1     | 3094-95        | Pyronemataceae (1)                                  |
| <i>Epipactis gigantea</i> <sup>§</sup> | Angelo Reserve | California    | 2     | 3096-99        | <i>Tulasnella</i> (2)                               |
| <i>Epipactis gigantea</i>              | Angelo Reserve | California    | 3     | 4000-03        | Pyronemataceae (4)                                  |
| <i>Epipactis gigantea</i> <sup>§</sup> | Angelo Reserve | California    | 3     | 4006-10        | Pyronemataceae (3)                                  |
| <i>Epipactis gigantea</i> <sup>§</sup> | Angelo Reserve | California    | 2     | 4018-22        | <i>Tulasnella</i> (3)†                              |
| <i>Epipactis gigantea</i>              | Angelo Reserve | California    | 1     | 4023-24        | Pyronemataceae (2)                                  |
| <i>Epipactis gigantea</i> <sup>§</sup> | Angelo Reserve | California    | 3     | 4029-37        | <i>Piriformospora</i> (7), Pyronemataceae (2)       |
| <i>Epipactis gigantea</i> <sup>§</sup> | Angelo Reserve | California    | 2     | 4039-42        | <i>Ceratobasidium</i> (2), <i>Tulasnella</i> (1)†   |
| <i>Epipactis gigantea</i> <sup>§</sup> | Angelo Reserve | California    | 2     | 4043-45        | <i>Thanatephorus</i> (2)                            |
| <i>Epipactis gigantea</i> <sup>§</sup> | Angelo Reserve | California    | 1     | 4047-48        | Pyronemataceae (2)                                  |
| <i>Epipactis gigantea</i> <sup>*</sup> | Angelo Reserve | California    | 1     | 4049-52        | <i>Tulasnella</i> (3)                               |
| <i>Epipactis gigantea</i> <sup>§</sup> | Angelo Reserve | California    | 3     | 4053-56        | <i>Ceratobasidium</i> (2)                           |
| <i>Epipactis gigantea</i> <sup>§</sup> | Crescent City  | California    | 3     | 6008-10        | <i>Tulasnella</i> (2)†                              |
| <i>Epipactis gigantea</i> <sup>§</sup> | Crescent City  | California    | 2     | 6011-12        | <i>Piriformospora</i> (2)                           |
| <i>Epipactis gigantea</i> <sup>§</sup> | Sharp's Creek  | Oregon        | 2     | 6137-38        | Pezizales (2)                                       |
| <i>Epipactis gigantea</i> <sup>§</sup> | Sharp's Creek  | Oregon        | 4     | 6139-42        | <i>Ceratobasidium</i> (3)                           |
| <i>Epipactis helleborine</i>           | UCBG           | California    | 1     | 1.1.a-d        | Pyronemataceae (4)                                  |
| <i>Epipactis helleborine</i>           | UCB            | California    | 2     | e.y.5.1-5.2    | <b>Tuber</b> (2)                                    |
| <i>Epipactis helleborine</i>           | UCB            | California    | 2     | e.p.y.A, e.b.C | <b>Tuber</b> (1), <b>Wilcoxina</b> (1)              |
| <i>Epipactis helleborine</i>           | UCB            | California    | 3     | A2-A5          | Pyronemataceae (4)                                  |
| <i>Epipactis helleborine</i>           | UCB            | California    | 3     | B1-B3          | <b>Piloderma</b> (1), Pyronemataceae (2)            |
| <i>Epipactis helleborine</i>           | UCB            | California    | 1     | E3             | Pyronemataceae (1)                                  |
| <i>Epipactis helleborine</i>           | UCB            | California    | 1     | D2             | Pyronemataceae (1)                                  |
| <i>Epipactis helleborine</i>           | UCB            | California    | 2     | F1, F2         | Pyronemataceae (2)                                  |
| <i>Epipactis helleborine</i>           | UCBG           | California    | 2     | 15.2-15.3      | <b>Tuber</b> (2)                                    |
| <i>Epipactis helleborine</i>           | UCBG           | California    | 3     | 12.1-12.3      | <b>Tuber</b> (2)                                    |
| <i>Epipactis helleborine</i>           | UCBG           | California    | 1     | 1.2.a, 1.2.b   | Pyronemataceae (2)                                  |
| <i>Epipactis helleborine</i>           | UCBG           | California    | 1     | 2.1.a          | Pyronemataceae (1)                                  |
| <i>Epipactis helleborine</i>           | UCBG           | California    | 2     | 8.3.a, b-d     | <b>Tuber</b> (2), <b>Wilcoxina</b> (1)              |
| <i>Epipactis helleborine</i>           | UCBG           | California    | 1     | 4.2.b          | Pyronemataceae (1)                                  |

|                                           |                     |               |   |         |                                             |
|-------------------------------------------|---------------------|---------------|---|---------|---------------------------------------------|
| <i>Epipactis helleborine</i>              | Heiburg Forest      | New York      | 1 | 6123    | <b>Tuber</b> (1)                            |
| <i>Epipactis helleborine</i>              | Heiburg Forest      | New York      | 1 | 6124    | <i>Phialophora</i> (1)                      |
| <i>Epipactis helleborine</i>              | Heiburg Forest      | New York      | 2 | 6125-27 | <b>Tuber</b> (3)                            |
| <i>Epipactis helleborine</i>              | Heiburg Forest      | New York      | 1 | 6128-29 | <b>Tuber</b> (2)                            |
| <i>Epipactis helleborine</i>              | Heiburg Forest      | New York      | 1 | 6130    | <b>Tuber</b> (1)                            |
| <i>Epipactis helleborine</i>              | Heiburg Forest      | New York      | 1 | 6131    | <i>Leptodontidium</i> (1)                   |
| <i>Epipactis helleborine</i>              | Heiburg Forest      | New York      | 2 | 6132-35 | <b>Tuber</b> (2)                            |
| <i>Epipactis helleborine</i>              | NYBG                | New York      | 4 | 6024-28 | Pezizales (4)                               |
| <i>Epipactis helleborine</i>              | NYBG                | New York      | 4 | 6029-32 | Pezizales (4)                               |
| <i>Epipactis helleborine</i>              | Syracuse            | New York      | 4 | 6091-96 | <i>Leptodontidium</i> (2), <b>Tuber</b> (3) |
| <i>Epipactis helleborine</i>              | Montréal Bot. Gard. | Québec        | 2 | 6098-99 | <b>Tuber</b> (2)                            |
| <i>Epipactis helleborine</i>              | Cambridge           | Massachusetts | 3 | 6005-07 | <b>Tuber</b> (2)                            |
| <i>Epipactis helleborine</i> <sup>‡</sup> | Cambridge           | Massachusetts | 3 | 6000-04 | <b>Tuber</b> (4)                            |
| <i>Epipactis helleborine</i>              | Warburg Reserve     | England       | 4 | 7001-04 | <i>Leptodontidium</i> (3)                   |
| <i>Epipactis helleborine</i>              | Warburg Reserve     | England       | 2 | 7023-24 | <i>Ceratobasidium</i> (1)                   |

Notes:

\* Non-photosynthetic underground seedling.

‡ Non-photosynthetic mature plant.

§ *Epipactis gigantea* plants adjacent to young, or rarely under mature, *Alnus rubra*. (All *E. dunensis* were under mature *Pinus sylvestris* and all *E. helleborine* were under mature *Quercus* spp., *Pinus* spp. or *Carpinus* spp.).

† DNA sequences obtained from PCR products generated with the primer combination ITS1/ITS4Tul. All others were generated with ITS1F/ITS4, except 1.1.a-d which was generated with NS5/ITS4.

Abbreviations: NYBG, New York Botanical Garden; UCBG, University of California Botanical Garden; UCB, University of California at Berkeley.
